# Supplementary material for: Cortical and subcortical glial cells undergo rapid changes following acute chemogenetic manipulation of a subpopulation of layer 5 projection neurons
Source: Research Square preprint supplement (doi:10.21203/rs.3.rs-3335293/v1), 2024-09-11
Supplement: Supplementary file 1 [file 9c42c27b5b08b7aaf7801561.xlsx]

## Sheet: Figure 1
Figure 1d
I/O excitatory curve																			Membrane voltage excitatory				Membrane resistance excitatory				Excitatory DREADD cFos density
Input current	Spinking Frequency										Spiking Frequency								Baseline	CNO 2 min	CNO 5 min		Baseline	CNO 2 min	CNO 5 min			Saline	CNO
	Baseline										CNO 2 min								-0.0673909	-0.0582332	-0.0643319		117802000	199446000	213388000		Mouse 1	2.07515	13.4746
-0.14	0	0	0	0	0	0	0	0	0	0	0	0	0	0	0	0	0		-0.0689899	-0.042434	-0.0462439		72709200	364165000	443974000		Mouse 2	1.79846	14.4154
-0.12	0	0	0	0	0	0	0	0	0	0	0	0	0	0	0	0	0		-0.0645504	-0.0572735	-0.0618018		134986000	294502000	339761000		Mouse 3	2.35183	12.9489
-0.1	0	0	0	0	0	0	0	0	0	0	0	0	0	0	0	0	0		-0.0628798	-0.0538675	-0.0536572		175715000	233752000	174157000		Mouse 4	2.21349
-0.08	0	0	0	0	0	0	0	0	0	0	0	0	0	0	0	0	0		-0.0605064	-0.0495275	-0.0648576		157944000	236732000	82220300		Mouse 5	1.66012
-0.06	0	0	0	0	0	0	0	0	0	0	0	0	0	0	0	0	0		-0.0617698	-0.0562482	-0.0466956		217580000	91222200	54016400		Mouse 6	2.13049
-0.04	0	0	0	0	0	0	0	0	0	0	0	0	0	0	0	0	0		-0.0636081	-0.0435535	-0.0551725		243083000	53375900	72874900
-0.02	0	0	0	0	0	0	0	0	0	0	0	0	0	0	0	0	0		-0.0733035	-0.0504778	-0.0677854		113541000	102593000	217688000
0	0	0	0	0	0	0	0	0	0	0	0	8.75	0	0	0	0	0		-0.0778692	-0.0593749	-0.0643405		79819400	205086000	155233000
0.02	0	0	0	0	3.75	7.5	2.5	0	0	0	0	11.25	10	7.5	7.5	0	0		-0.0697532	-0.0648527			111197000	141089000
0.04	10	0	2.5	2.5	8.75	12.5	5	0	0	0	11.25	12.5	17.5	6.25	12.5	0	0		-0.0649881				94440100
0.06	17.5	0	15	6.25	11.25	13.75	6.25	1.25	0	0	16.25	16.25	22.5	8.75	16.25	8.75	8.75
0.08	22.5	2.5	22.5	8.75	13.75	16.25	8.75	3.75	0	3.75	21.25	17.5	26.25	10	17.5	15	13.75
0.1	26.25	7.5	26.25	11.25	16.25	18.75	10	7.5	0	7.5	26.25	20	27.5	12.5	20	20	13.75
0.12	30	12.5	30	12.5	18.75	21.25	12.5	12.5	0	10	30	20	30	13.75	22.5	23.75	15
0.14	32.5	15	31.25	16.25	21.25	22.5	12.5	16.25	1.25	12.5	32.5	21.25	31.25	15	22.5	26.25	16.25
0.16	36.25	18.75	33.75	23.75	22.5	23.75	13.75	18.75	1.25	13.75	37.5	21.25	32.5	16.25	23.75	28.75	16.25
0.18	37.5	21.25	35	17.5	23.75	23.75	13.75	21.25	2.5	15	37.5	22.5	32.5	17.5	26.25	31.25	17.5
0.2	38.75	22.5	36.25	18.75	25	26.25	13.75	23.75	3.75	15	37.5	22.5	33.75	17.5	26.25	33.75	18.75
0.22	40	23.75	36.25	20	26.25	26.25	15	26.25	5	16.25	38.75	23.75	33.75	18.75	27.5	35	18.75
0.24	41.25	25	37.5	21.25	27.5	27.5	16.25	27.5	7.5	16.25	41.25	25	33.75	20	27.5	36.25	16.25
Figure 1f
I/O inhibitory curve																		Membrane voltage inhibitory				Membrane resistance inhibitory				Inhibitory DREADD cFos density
Input current	Spinking Frequency							Spiking Frequency										Baseline	CNO 2 min	CNO 5 min		Baseline	CNO 2 min	CNO 5 min			Saline	CNO
	Baseline							CNO 2 min										-0.069915	-0.0715802	-0.0655051		77423700	1.27481e+08	142000000		Mouse 1	2.10282	0.110675
-0.14	0	0	0	0	0	0	0	0	0	0	0	0	0	0	0	0		-0.0667972	-0.0598938	-0.0575684		96673300	1.31335e+08	122000000		Mouse 2	2.10282	0.221349
-0.12	0	0	0	0	0	0	0	0	0	0	0	0	0	0	0	0		-0.0722491	-0.0624408	-0.0549294		100959000	1.6382e+08	139000000
-0.1	0	0	0	0	0	0	0	0	0	0	0	0	0	0	0	0		-0.0610484	-0.0579545	-0.0524789		96815300	9.71519e+07	80605717
-0.08	0	0	0	0	0	0	0	0	0	0	0	0	0	0	0	0		-0.067692	-0.0706094	-0.0693989		86389900	1.03993e+08	106000000
-0.06	0	0	0	0	0	0	0	0	0	0	0	0	0	0	0	0		-0.0700955	-0.0681033	-0.0655304		93003100	1.65101e+08	176000000
-0.04	0	0	0	0	0	0	0	0	0	0	0	0	0	0	0	0		-0.0655167	-0.0682963	-0.0667827		103873000	1.78019e+08	192000000
-0.02	0	0	0	0	0	0	0	0	0	0	0	0	0	0	0	0		-0.0658191	-0.0589984	-0.0650291		85008700	1.41614e+08	135000000
0	0	0	6.25	0	0	0	0	0	0	0	0	0	0	0	0	0						98874200	1.02047e+08	96690229
0.02	0	0	11.25	0	0	0	0	0	0	0	0	6.25	0	0	0	0
0.04	0	0	12.5	0	0	0	0	0	0	7.5	0	8.75	1.25	0	0	0
0.06	0	2.5	13.75	0	0	0	0	0	0	12.5	1.25	11.25	8.75	2.5	2.5	0
0.08	2.5	5	17.5	3.75	0	0	0	0	0	16.25	5	13.75	13.75	5	8.75	0
0.1	7.5	7.5	31.25	10	2.5	6.25	3.75	5	0	17.5	6.25	16.25	17.5	7.5	13.75	2.5
0.12	12.5	8.75	18.75	16.25	6.25	11.25	6.25	7.5	2.5	21.25	7.5	17.5	20	10	17.5	6.25
0.14	16.25	11.25	21.25	20	8.75	15	10	10	3.75	23.75	10	18.75	22.5	12.5	20	7.5
0.16	18.75	13.75	20	22.5	12.5	18.75	12.5	11.25	5	26.25	11.25	18.75	25	15	22.5	11.25
0.18	22.5	15	18.75	25	15	21.25	13.75	13.75	10	27.5	13.75	20	26.25	17.5	26.25	15
0.2	25	16.25	16.25	27.5	17.5	23.75	16.25	15	12.5	28.75	15	22.5	28.75	18.75	27.5	16.25
0.22	26.25	18.75	17.5	30	20	26.25	18.75	16.25	13.75	30	17.5	22.5	30	20	28.75	17.5
0.24	28.75	20	17.5	31.25	21.25	27.5	20	17.5	16.25	32.5	18.75	23.75	31.25	21.25	30	20

## Sheet: Figure 2
Figure 2a
Excitatory DREADD cFos density
	Visual cortex layer 5				Superior Colliculus				Hippocampus CA1				Hippocampus CA3
Animals	Saline	0.05 mg/kg CNO	0.1 mg/kg CNO	10 mg/kg CNO	Saline	0.05 mg/kg CNO	0.1 mg/kg CNO	10 mg/kg CNO	Saline	0.05 mg/kg CNO	0.1 mg/kg CNO	10 mg/kg CNO	Saline	0.05 mg/kg CNO	0.1 mg/kg CNO	10 mg/kg CNO
Mouse 1	4.70367	5.94876	6.77882	11.8975	1.60478	2.10282	2.04748	4.20563	0.0276686	0.110675	0.138343	1.16208	0.0276686	0.110675	0.166012	1.71546
Mouse 2	4.62066	5.97643	6.69581	15.5774	1.54944	1.66012	1.90914	3.40324	0.0276686	0.0553373	0.110675	0.830059	0.0276686	0.110675	0.110675	1.49411
Mouse 3	4.01195			15.1071	1.02374			2.07515	0			0.968402	0.0276686			1.43877
Mouse 4	3.95662				1.13441				0.0276686				0.0276686
Mouse 5	4.1503				1.02374				0.0276686				0
Mouse 6	3.62459				1.10675				0.0276686				0.0276686
Figure 2c
Excitatory DREADD % vGlut1/PSD95 (normalized to saline)
	Visual cortex layer 5				Superior Colliculus				Hippocampus CA1				Hippocampus CA3
Animals	Saline	0.05 mg/kg CNO	0.1 mg/kg CNO	10 mg/kg CNO	Saline	0.05 mg/kg CNO	0.1 mg/kg CNO	10 mg/kg CNO	Saline	0.05 mg/kg CNO	0.1 mg/kg CNO	10 mg/kg CNO	Saline	0.05 mg/kg CNO	0.1 mg/kg CNO	10 mg/kg CNO
Mouse 1	95.9434	73.3147	76.4708	56.9906	109.159	93.8334	80.0509	75.3576	102.488	76.7419	70.8564	75.3736	102.462	55.3383	79.8894	75.3576
Mouse 2	135.364	54.843	79.2927	63.8827	99.004	70.8955	70.2837	74.8528	103.844	84.9044	95.3629	87.4539	141.654	70.6195	76.1064	74.8528
Mouse 3	69.5131			55.537	110.381			61.7334	99.1758			87.8537	80.2881			61.7334
Mouse 4	99.1794				81.456				94.4922				75.596
Figure 2e
Inhibitory DREADD cFos density
	Visual cortex layer 5			Superior Colliculus			Hippocampus CA1			Hippocampus CA3
Animals	Saline	1 mg/kg CNO	5 mg/kg CNO	Saline	1 mg/kg CNO	5 mg/kg CNO	Saline	1 mg/kg CNO	5 mg/kg CNO	Saline	1 mg/kg CNO	5 mg/kg CNO
Mouse 1	3.7076	1.77079	0.774722	2.21349	0.221349	0.0830059	0.0276686	0.0276686	0	0.0276686	0	0
Mouse 2	3.92895	1.8538	0.857728	2.54551	0.276686	0.110675	0.0553373	0	0	0.0830059	0	0
Figure 2g
Inhibitory DREADD % vGlut1/PSD95 (normalized to saline)
	Visual cortex layer 5			Superior Colliculus			Hippocampus CA1			Hippocampus CA3
Animals	Saline	1 mg/kg CNO	5 mg/kg CNO	Saline	1 mg/kg CNO	5 mg/kg CNO	Saline	1 mg/kg CNO	5 mg/kg CNO	Saline	1 mg/kg CNO	5 mg/kg CNO
Mouse 1	102.86	137.757	140.835	101.885	112.959	117.326	95.6831	188.79	189.657	89.0778	137.247	141.448
Mouse 2	97.1404	133.62	142.396	98.1147	110.465	113.02	104.317	186.496	193.385	110.922	126.676	139.595

## Sheet: Figure 3
Figure 3b	Iba1+ cell density					Figure 3d	Iba1+ cell density				Figure 3f
Primary visual cortex layer 1						Saline					Saline
Animal	Saline	0.05mg/kg	0.1mg/kg	10mg/kg			SC	CA1	CA3			L5	SC	CA1	CA3
Mouse 1	1.11408	1.17168	1.1036	1.07018		Animal	Density	Density	Density		Animal	CD68	CD68	CD68	CD68
Mouse 2	1.86962	1.23384	0.720934	1.19727		Mouse 1	0.968402	1.52178	1.60478		Mouse 1	46.4286	40.7135	39.7487	29.4048
Mouse 3	2.20329			1.32543		Mouse 2	1.01452	1.46644	1.52178		Mouse 2	38.7153	43.9692	38.1054	32.8249
Mouse 4	2.73216					Mouse 3	0.830059	1.38343	1.71546		Mouse 3	47.7778	42.2922	33.8141	30.7292
Primary visual cortex layer 2-4						Mouse 4	0.830059	1.57711	1.46644		Mouse 4	46.5035	45.0421	33.625	30.0714
Animal	Saline	0.05mg/kg	0.1mg/kg	10mg/kg		Mouse 5	1.05141	1.77079	2.04748		Mouse 5	43.5606	40.7357	39.3137	31.3919
Mouse 1	0.945491	1.16051	1.30632	1.18274		Mouse 6	0.802391	1.66012	1.43877		Mouse 6	41.1765	42.8286	36.5962	32.9085
Mouse 2	3.20045	1.28041	0.687369	1.44168		CNO 0.05mg/kg					CNO 0.05mg/kg
Mouse 3	1.89833			1.84673			SC	CA1	CA3			L5	SC	CA1	CA3
Mouse 4	3.00032					Animal	Density	Density	Density		Animal	CD68	CD68	CD68	CD68
Primary visual cortex layer 5						Mouse 1	0.691716	1.52178	1.18975		Mouse 1	47.2884	42.2869	42.6667	49.5652
Animal	Saline	0.05mg/kg	0.1mg/kg	10mg/kg		Mouse 2	0.654824	1.27276	1.43877		Mouse 2	44.6429	48.2564	43.3712	44.7005
Mouse 1	2.38354	1.82472	1.6769	2.22036		CNO 0.1mg/kg					CNO 0.1mg/kg
Mouse 2	3.45221	1.76355	1.47116	2.00914			SC	CA1	CA3			L5	SC	CA1	CA3
Mouse 3	2.61397			2.311		Animal	Density	Density	Density		Animal	CD68	CD68	CD68	CD68
Mouse 4	4.0886					Mouse 1	0.691716	1.13441	0.913065		Mouse 1	52.2727	48.1766	58.134	62.9699
Primary visual cortex layer 6						Mouse 2	0.645602	1.27276	1.16208		Mouse 2	44.2724	48.7879	56.1905	50
Animal	Saline	0.05mg/kg	0.1mg/kg	10mg/kg		CNO 10mg/kg					CNO 10mg/kg
Mouse 1	1.7185	1.24122	1.41751	1.86989			SC	CA1	CA3			L5	SC	CA1	CA3
Mouse 2	3.59079	2.34354	1.33327	2.35825		Animal	Density	Density	Density		Animal	CD68	CD68	CD68	CD68
Mouse 3	2.44249			2.69203		Mouse 1	0.359692	1.05141	0.636379		Mouse 1	47.7273	48.1151	62.1849	64.6154
Mouse 4	3.86683					Mouse 2	0.553373	1.07908	0.913065		Mouse 2	54.1667	50.8991	66.1765	70.5556
Figure 3c	Iba1+ cell density					Mouse 3	0.387361	0.940734	0.747053		Mouse 3	56.4394	51.6071	58.2456	65.9091
Primary visual cortex
Animal	Saline	0.05mg/kg	0.1mg/kg	10mg/kg
Mouse 1	1.5404	1.34954	1.37608	1.58579
Mouse 2	3.02827	1.65534	1.05318	1.75158
Mouse 3	2.28952			2.0438
Mouse 4	3.42198
Figure 3h	Iba1+ cell density					Figure 3j	Iba1+ cell density				Figure 3l	CD68 in Iba1+ microglia
Primary visual cortex layer 1						Saline					Saline
Animal	Saline	1mg/kg	5mg/kg				SC	CA1	CA3			L5	SC	CA1	CA3
Mouse 1	1.09618	1.14424	3.28985			Animal	Density	Density	Density		Animal	CD68	CD68	CD68	CD68
Mouse 2	1.67232	1.62122	2.16351			Mouse 1	1.06063	1.27276	1.82613		Mouse 1	6.2269	7.85384	8.7619	6.52377
Primary visual cortex layer 2-4						Mouse 2	1.10675	1.38343	1.68779		Mouse 2	7.72947	7.72904	6.08974	8.11828
Animal	Saline	1mg/kg	5mg/kg			CNO 1 mg/kg					CNO 1 mg/kg
Mouse 1	2.33102	2.20141	4.5425				SC	CA1	CA3			L5	SC	CA1	CA3
Mouse 2	2.42335	2.62119	4.1986			Animal	Density	Density	Density		Animal	CD68	CD68	CD68	CD68
Primary visual cortex layer 5						Mouse 1	1.43877	1.8538	1.82613		Mouse 1	2.04545	5.03253	5.97148	6.06061
Animal	Saline	1mg/kg	5mg/kg			Mouse 2	1.33732	1.68779	2.18582		Mouse 2	5.33428	4.94993	6.55914	6.3141
Mouse 1	2.98354	2.68516	4.68316			CNO 5mg/kg					CNO 5mg/kg
Mouse 2	2.00289	2.72173	4.06013				SC	CA1	CA3			L5	SC	CA1	CA3
Primary visual cortex layer 6						Animal	Density	Density	Density		Animal	CD68	CD68	CD68	CD68
Animal	Saline	1mg/kg	5mg/kg			Mouse 1	1.37421	3.04355	2.43484		Mouse 1	2.15079	4.837	2.69778	1.02041
Mouse 1	1.46882	2.40944	3.62536			Mouse 2	1.46644	2.2965	2.01981		Mouse 2	3.02177	3.59543	2.4269	4.22323
Mouse 2	1.71444	2.39191	3.00942
Figure 3i	Iba1+ cell density
Primary visual cortex
Animal	Saline	1mg/kg	5mg/kg
Mouse 1	1.96989	2.11006	4.03522
Mouse 2	1.95325	2.33901	3.35791

## Sheet: Figure 4
Figure 4b										Figure 4c								Figure 4f
Microglia volume										Microglia volume									Visual cortex layer 5
	Saline		0.05 mg/kg CNO		0.1 mg/kg CNO		10 mg/kg CNO				Saline		1 mg/kg CNO		5 mg/kg CNO				Saline
Cell	L5	CA3	L5	CA3	L5	CA3	L5	CA3		Cell	L5	CA3	L5	CA3	L5	CA3		radius, μm	Cell 1	Cell 2	Cell 3	Cell 4	Cell 5	Cell 6	Cell 7	Cell 8	Cell 9	Cell 10	Cell 11	Cell 12	Cell 13	Cell 14	Cell 15	Cell 16	Cell 17	Cell 18	Cell 19	Cell 20	Cell 21	Cell 22	Cell 23	Cell 24	Cell 25	Cell 26	Cell 27	Cell 28	Cell 29	Cell 30	Cell 31
Cell 1	525.459	931.128	293.688	691.434	774.358	765.34	708.025	494.191		Cell 1	378.4	430.686	515.373	275.34	673.217	666.195		5	1	4	3	3	1	2	1	2	2	2	2	3	1	1	4	1	1	1	1	1	4	3	2	4	3	4	5	1	2	3	2
Cell 2	519.908	1182.3	735.284	372.373	1117.83	413.609	858.407	527.63		Cell 2	394.358	416.128	391.88	439.068	539.201	678.542		6	5	5	4	5	5	5	5	3	5	2	2	6	3	4	5	3	2	1	6	3	3	5	3	7	6	5	4	5	3	4	4
Cell 3	978.708	870.554	698.8	527.763	611.304	679.98	339.582	622.572		Cell 3	732.624	427.131	270.874	510.54	355.967	314.758		7	2	4	2	5	5	6	3	4	6	2	2	2	2	7	5	4	4	2	4	2	5	7	3	7	7	6	4	3	4	3	3
Cell 4	946.187	1128.28	344.312	448.065	403.955	583.457	943.461	942.318		Cell 4	401.88	664.76	179.54	559.134	372.863	524.141		8	2	2	2	6	5	3	7	2	6	1	6	1	2	8	7	4	4	2	3	4	5	7	5	6	6	9	6	3	2	2	1
Cell 5	878.41	1063.84	249.434	410.899	468.032	903.107	930.646	1226.87		Cell 5	450.367	756.629	70.9804	663.22	756.357	438.404		9	1	2	2	4	4	3	5	1	4	1	4		2	5	5	7	3	3	3	2	5	3	4	4	6	7	4	3	4	2	1
Cell 6	813.817	815.644	174.59	746.371	396.572	447.623	478.312	666.133		Cell 6	550.367	266.089	210.744	656.283	416.899	379.702		10	1	2	2	1	4	3	5	1	3	4	3		1	3	4	9	4	6	3		3	3	5	3	6	5	3	3	2	2
Cell 7	1006.64	1029.22	820.522	580.763	492.619	513.558	948.686	1184.29		Cell 7	307.542	439.392	116.361	695.641	381.45	379.098		11	1	2	3	2	3	3	3	1	3	4	2		1	2	4	9	2	5	2		2	3	4	5	5	7	3	3	2	2
Cell 8	815.297	855.874	515.939	403.203	247.744	588.774	857.665	1089.35		Cell 8	348.08	247.445	109.352	872.77	187.871	316.876		12	1	2	4	2	2	4	2	1	3	3	1			1	3	7	2	7	5		2	3	4	3	4	6	1	2	2	3
Cell 9	931.76	817.332	497.137	684.741	452.759	513.112	993.63	1271.88		Cell 9	234.279	262.429	174.275	690.921	215.104	348.216		13	2		2	2	2	4	2	1	3	2	1				4	7	3	6	2			3	4	2	4	4	2	1	4
Cell 10	714.963	1097.14	765.85	454.402	360.761	901.529	832.467	1097.92		Cell 10	248.775	564.509	324.279	469.259	167.546	339.407		14	3		2	2	2	5	4	1	2	3	1				3	5	3	4	2			3	4	2	4	3	1	1	3
Cell 11	923.607	955.011	337.624	658.174	213.175	726.497	720.51	552.212		Cell 11	318.745	400.213	244.279	402.895	281.887	572.198		15	3		2	2	1	3	3	1	1	2	1				2	4	3	6	2			3	4	2	4	3	1	1	2
Cell 12	878.076	588.077	501.087	524.091	393.241	334.032	940.324	592.507		Cell 12	391.851	524.387	156.643	626.414	254.499	360.75		16	3		1	1	1	3	1			2	1				2	3	2	3	2			3	3	3	4	3	1		2
Cell 13	471.532	874.726					747.768	1049.4		Primary branches								17	2		1	1	1	4	1			2	1				2	2	2	4	2			3	2	1	4	4	1		2
Cell 14	719.725	1031.94					617.4	963.595			Saline		1 mg/kg CNO		5 mg/kg CNO			18				1	1	4				1	1				2	2	1	2	2			3	1	1	3	3	1		1
Cell 15	1107.97	941.453					1119.59	625.413		Cell	L5	CA3	L5	CA3	L5	CA3		19					1	4				1	1				2	2	1	1	3			2	1	1	4	3	1
Cell 16	1064.17	1034.14					724.625	462.607		Cell 1	4	2	1	1	1	5		20					1	2					1				2	2	1	1	2			2		1	3	4
Cell 17	1063.98	790.433					899.272	488.326		Cell 2	3	3	3	1	4	3		21						1					1				2	2	1	1	2			2		2	1	4
Cell 18	901.625	848.352					1066.35	579.718		Cell 3	3	1	4	3	2	1		22						1									3	2	1	1	2			2		3	1	3
Cell 19	901.694	803.755								Cell 4	5	4	1	3	4	2		23															2	2	1		1			1		2		2
Cell 20	581.375	1013.89								Cell 5	3	3	2	3	1	2		24															3	2	2		1			1		2		2
Cell 21	591.36	947.869								Cell 6	4	1	2	4	1	4		25															3	2	1		2			1		1		3
Cell 22	1821.88	1213.73								Cell 7	5	4	1	2	3	3		26															1	1	1		2			1		1		2
Cell 23	811.768	789.636								Cell 8	4	4	3	1	2	2		27															1	1			1			1		1		1
Cell 24	1133.52	870.881								Cell 9	4	4	2	4	2	3		28															1	1						1		1		1
Cell 25	386.829	229.047								Cell 10	2	5	4	1	1	2		29															1	1						1		1		1
Cell 26	173.681	360.907								Cell 11	2	4	5	3	2	4		30															1	1								1		1
Cell 27	370.642	385.829								Cell 12	3	2	3	3	2	2		31															1	1								1		1
Cell 28	385.774	396.684								Microglia soma area								32															1	1								1		1
Cell 29	282.405	343.013									Saline		1 mg/kg CNO		5 mg/kg CNO			33															1	1								1		1
Cell 30	291.104	219.644								Cell	L5	CA3	L5	CA3	L5	CA3		34															1	1								1		1
Cell 31	291.104	1059.35								Cell 1	52.4214	48.3486	51.2621	37.1808	67.7314	73.5237		35															1									1		1
Cell 32	584.204	577.939								Cell 2	44.4885	51.0059	59.3296	46.564	48.6351	52.9077			0.05 mg/kg CNO												0.1 mg/kg CNO
Cell 33	645.59	636.345								Cell 3	53.6241	39.0566	46.4033	39.1044	41.8833	41.2667		radius, μm	Cell 1	Cell 2	Cell 3	Cell 4	Cell 5	Cell 6	Cell 7	Cell 8	Cell 9	Cell 10	Cell 11	Cell 12	Cell 1	Cell 2	Cell 3	Cell 4	Cell 5	Cell 6	Cell 7	Cell 8	Cell 9	Cell 10	Cell 11	Cell 12
Cell 34	629.726	869.138								Cell 4	53.381	46.1081	35.1271	49.0693	45.2831	41.3883		5	2	2	4	7	4	5	2	2	3	4	4	2	3	3	3	2	2	3	3	3	3	4	5	2
Cell 35	758.575	470.981								Cell 5	44.0456	52.4561	43.1859	55.3349	35.9607	41.3362		6	3	2	5	9	9	5	3	3	3	5	9	4	2	3	4	4	2	3	6	5	3	5	2	4
Cell 36	329.966	611.619								Cell 6	39.8034	35.4744	50.4458	56.885	45.4958	41.4447		7	3	2	5	9	9	3	4	4	4	5	4	3	1	4	6	3	2	3	5	4	3	6	2	2
Primary branches										Cell 7	46.5987	56.0643	57.268	49.485	45.0312	43.0122		8	3	2	5	8	6	1	5	5	3	5	4	3	2	4	5	1	2	3	4	3	2	7	1	2
	Saline		0.05 mg/kg CNO		0.1 mg/kg CNO		10 mg/kg CNO			Cell 8	46.8505	44.2714	33.247	45.534	44.0546	55.5917		9	2	1	4	7	4	1	6	6	3	9	4	3	2	3	5	1	1	2	4	3	4	4	1	2
Cell	L5	CA3	L5	CA3	L5	CA3	L5	CA3		Cell 9	30.1424	49.265	48.8739	51.6094	59.9166	55.8956		10	3	1	3	6	3	1	7	7	3	8	4	3	1	3	4	1	1	1	4	1	2	3	1	2
Cell 1	2	5	1	4	3	4	2	2		Cell 10	47.9968	46.0215	33.451	33.7202	47.9977	39.6124		11	3	1	3	5	2	1	6	5	2	7	1	3	1	4	4	1	1	1	3	1	3	6	1	2
Cell 2	3	7	3	1	5	3	2	1		Cell 11	54.219	41.9354	51.6702	65.0089	60.0116	50.0897		12	2	1	2	4	1	1	5	4	1	5	1	2	1	4	3	1	1	1	2	1	2	4	1	2
Cell 3	3	5	4	2	5	3	1	2		Cell 12	50.7367	50.0897	54.9493	32.1441	50.5375	47.0419		13	1	1	2	3	1	1	4	3	1	4	1	2	1	4	3	1	1	1	3	1	2	2	1	2
Cell 4	2	3	2	2	4	3	1	1										14	1	1	1	1	1		3	2	1	3	1	2	1	4	3	1	1	2	3	1	2	1	1	2
Cell 5	2	1	1	2	3	2	1	3										15	1	1	1	1	1		2	1	1	1		2	1	4	3	1	1	1	2	1	1	1	1	2
Cell 6	4	3	1	4	3	1	2	1										16	1	1		1	1		1	1	1	1		1	1	5	2	1	1	1	2	1	1	1	1	1
Cell 7	2	3	1	3	2	1	1	2										17	1	1		1	1		1	1	1	1		1	1	3	2	1	1	1	2	1	1	1	1	1
Cell 8	3	3	2	2	3	1	1	1										18	1	1		1	1		1	1	1	1		1	1	3	2	1	1	1	1		1	1		1
Cell 9	3	3	2	3	2	3	1	1										19	1	1			1		1	1	1	1		1	1	3	4	1		1	1		1			1
Cell 10	3	2	5	3	2	2	1	1										20	1						1	1	1	1			1	2	1	1		1	1		1			1
Cell 11	2	3	1	0	3	2	1	1										21	1						1	1	1	1			1	1		1		1			1			1
Cell 12	1	2	2	4	4	2	1	1										22	1						1	1					1	1		1		1			1			1
Cell 13	2	3					1	1										23							1						1	1		1		1			1			1
Cell 14	1	3					1	2										24													1	1		1		1			1			1
Cell 15	3	2					2	2										25													1	1		1		1						1
Cell 16	4	2					1	2										26													1	1		1
Cell 17	3	2					1	1										27													1	1
Cell 18	3	2					1	1										28													1
Cell 19	3	1																	10 mg/kg CNO
Cell 20	1	2																radius, μm	Cell 1	Cell 2	Cell 3	Cell 4	Cell 5	Cell 6	Cell 7	Cell 8	Cell 9	Cell 10	Cell 11	Cell 12	Cell 13	Cell 14	Cell 15	Cell 16	Cell 17	Cell 18
Cell 21	1	3																5	1	1	1	1	1	1	1	2	1	3	1	2	1	4	4	3	1	2
Cell 22	3	3																6	3	8	5	3	3	3	4	1	2	3	2	2	3	6	4	4	3	2
Cell 23	2	3																7	1	7	1	4	4	2	5	3	4	5	5	2	2	6	4	5	3	3
Cell 24	3	4																8	1	7	1	4	6	2	2	3	5	4	9	3	1	6	3	4	3	4
Cell 25	3	0																9	1	7	1	4	8	1	2	1	5	6	9	3	3	2	2	4	5	5
Cell 26	2	2																10	1	7	1	5	5	1	5	1	4	4	8	3	1	1	1	2	4	3
Cell 27	3	2																11	1	5	1	5	4	1	2	1	4	5	5	3	3			4	4	1
Cell 28	4	1																12	1	4	1	6	3	1	2	1	3	4	4	4	3			2	5	1
Cell 29	3	1																13		6	1	7	2	1	2	1	2	2	3	4	2			2	5	1
Cell 30	2	1																14		6		6	1	1	2		2	2	2	3	2			1	3	1
Cell 31	4	4																15		5		5	1	2	1		2	1	3	2	2			1	3	1
Cell 32	5	3																16		2		4	1	3	2		1	1	2	2	2			1	1	1
Cell 33	4	5																17		1		4	1	2			2	1	1	2	3			1	1
Cell 34	6	2																18		1		5		2			3	1	1	2	3			1	1
Cell 35	2	1																19				3		1			2	1	1	1	3			1	1
Cell 36	1	3																20				2		2			2	1		1	2			1	1
Microglia soma area																		21				3		1			1			1	1			1
	Saline		0.05 mg/kg CNO		0.1 mg/kg CNO		10 mg/kg CNO
Cell	L5	CA3	L5	CA3	L5	CA3	L5	CA3											Hippocampus CA3
Cell 1	66.0163	52.9164	48.6221	57.2237	53.0423	52.4257	61.9825	48.3355											Saline
Cell 2	36.5643	48.5396	66.7327	47.4671	58.9257	39.417	50.0897	51.4488										radius, μm	Cell 1	Cell 2	Cell 3	Cell 4	Cell 5	Cell 6	Cell 7	Cell 8	Cell 9	Cell 10	Cell 11	Cell 12	Cell 13	Cell 14	Cell 15	Cell 16	Cell 17	Cell 18	Cell 19	Cell 20	Cell 21	Cell 22	Cell 23	Cell 24	Cell 25	Cell 26	Cell 27	Cell 28	Cell 29	Cell 30	Cell 31
Cell 3	50.9364	53.8282	79.3854	45.8389	79.3203	55.4434	44.2931	60.6756										5	2	1	4	3	1	4	2	3	6	1	4	2	1	3	1	2	1	2	3	1	2	1	2	1	2	5	3	4	2	6	1
Cell 4	55.9254	38.6832	47.3282	50.9842	38.1925	32.5175	71.7955	86.8016										6	3	3	7	3	2	6	1	2	4	2	3	5	2	3	3	3	5	3	3	3	3	1	4	4	6	3	6	4	3	7	5
Cell 5	74.6439	105.668	29.7039	55.3913	49.8118	59.9114	45.9648	86.0765										7	5	4	8	4	2	4	3	2	4	5	5	4	5	1	4	3	2	2	7	5	4	5	3	4	5	3	5	3	4	5	6
Cell 6	46.1558	68.2438	35.6047	51.7701	47.7276	61.036	57.9401	82.6723										8	6	6	6	5	5	4	5	2	4	5	5	3	4	4	5	8	4	2	6	8	6	6	4	6	5	3	4	4	3	4	4
Cell 7	84.3874	65.1435	55.0509	57.4625	55.6562	64.5921	83.1369	60.5757										9	8	5	4	5	4	6	5	2	5	6	4	3	4	3	5	8	2	5	5	7	3	5	5	4	7	5	6	5	4	2	8
Cell 8	69.0687	52.912	56.6245	38.0189	35.7697	61.7177	44.8055	70.7882										10	9	4	5	5	5	3	6	4	6	4	7	3	5	2	5	4	2	3	4	3	3	6	2	3	4	3	3	4	3	2	8
Cell 9	77.0277	57.0326	46.2644	36.7466	47.9274	38.2967	46.2731	49.8769										11	8	4	5	7	5	3	7	3	4	3	8	3	4	2	4	4	1	3	2	2	3	7	2	3	2	3	2	4	4	1	5
Cell 10	44.2844	86.997	50.8539	49.6598	47.7841	56.9935	42.6779	59.1428										12	7	4	3	6	3	3	9	3	3	2	6	2	4	2	5	4	1	2	1	2	3	4	2	3	2	2	2	1	5		7
Cell 11	106.727	51.6355	57.7621	82.3119	33.1862	63.2113	58.9344	52.1261										13	7	4	3	4	1	2	9	4	3	3	6	1	4	3	3	3	1	3	1	2	3	3	3	4	2	1	2	1	5		8
Cell 12	58.865	67.7835	43.8502	50.5847	37.5022	35.5526	92.5374	43.0035										14	4	3	2	3		2	7	5	3	2	6	1	4	1	3	3	1	3	1	2	3	2	2	3	1		1	1	5		4
Cell 13	42.908	65.1653					34.8709	59.386										15	3	3	3	3		2	5	5	2	2	7	1	2	1	1	2	1	1	1	1	2	1	2	2	1			1	4		1
Cell 14	79.7371	62.9291					57.8402	37.5065										16	3	3	3	3		2	3	3	1	2	5	1	2	1	1	2	1	1	1	1	2	1	2	2				1	1		1
Cell 15	68.678	56.1468					50.7584	77.679										17	3	2	3	3		3	3	3	1	2	5	1	1	1	1	2	1	1	1	1	2	1	1	2				1	1		1
Cell 16	65.9208	45.9604					50.9928	64.4922										18	2	2	4	3		3	2	3	1	1	6		1	1	1	2		1		1	2	1	1	1				1	1		1
Cell 17	51.1709	68.7605					71.4351	80.332										19	1	2	2	2		2	2	1	1	1	3		1	1	1	2		1		1	1	1	1	1				1	1		1
Cell 18	81.4696	46.2253					100.957	54.6488										20		1	2	2		1	1	1	1	1	5			1	1	2		1		1	1		1	1				1	1		1
Cell 19	37.5499	52.378																21		1	1	2			1	1	1	1	6			1	1	1		1		1	1			1					1		1
Cell 20	53.1508	70.9575																22		1	1	1			1	1	1	1	5			1		1		1		1	1								1		1
Cell 21	41.2189	50.8452																23		1		1			1	1	1	1	3			1		1		1		1	1										1
Cell 22	45.752	57.4364																24		1		1			1	1	1	1	3			1		1		1			1
Cell 23	42.9992	41.5706																25		1		1				1	1	1	3			1		1		1
Cell 24	43.0426	35.0011																26		1		1				1	1	1	2			1		1
Cell 25	48.1445	35.8392																27		1		1				1	1	1	2					1
Cell 26	49.395	48.4614																28		1		1				1	1	1	2					1
Cell 27	43.5289	47.4411																29		1		1					1	1	2					1
Cell 28	38.4096	45.3612																30		1		1					1	1	1					1
Cell 29	41.6184	54.4057																31		1							1	1	1
Cell 30	33.5335	34.4801																32		1							1	1	1
Cell 31	51.4754	73.8102																33									1	1
Cell 32	53.9761	59.7073																34										1
Cell 33	64.6529	59.5944																35										1
Cell 34	60.9193	44.1107																36										1
Cell 35	53.4722	42.73																37
Cell 36	52.0306	61.7568																38
																			0.05 mg/kg CNO												0.1 mg/kg CNO
																		radius, μm	Cell 1	Cell 2	Cell 3	Cell 4	Cell 5	Cell 6	Cell 7	Cell 8	Cell 9	Cell 10	Cell 11	Cell 12	Cell 1	Cell 2	Cell 3	Cell 4	Cell 5	Cell 6	Cell 7	Cell 8	Cell 9	Cell 10	Cell 11	Cell 12
																		5	1	4	3	4	2	1	4	5	3	4	6	7	10	5	4	8	10	2	5	4	5	3	2	3
																		6	1	3	3	5	4	1	3	8	5	7	5	4	8	3	4	3	6	3	3	4	6	4	1	4
																		7		3	4	1	3		4	7	5	8	4	3	8	2	4	5	5	4	2	2	3	3	6	4
																		8		3	3	1	5		5	7	5	6	8	2	4	1	3	3	3	4	1	1	4	2	1	3
																		9		3	2	1	4		3	7	3	5	7	2	7	1	2	1	2	5	1	1	3	2		4
																		10		3	2		1		2	5	3	6	6	2	4	1	3	1	2	5	1	2	3	1		4
																		11		3	2				2	3	3	6	4	1	3	1	1	1		6	1	1	4	2		2
																		12		1	2				1	3	3	7	3		3	1	1	3		2	2	1	6	2		2
																		13		1	2				1	1	2	6	2		2		2	2		2	2		2	1		2
																		14			2					1	2	5	3		2		3	2		1	2		1	1		1
																		15			1					1	2	4	2		2		3	1		2	2			1		1
																		16			2					1	2	5	3		1		2			2	2			1		1
																		17			1					1	1	4	3		1		1				3
																		18			1					1		3	3		1						3
																		19			1					1		3	3		1						3
																		20			2					1		3	2		1						2
																		21			1							3	2		1						2
																		22			1							4	1		1						1
																		23			1							2									1
																		24			1							2									1
																		25			2							2									1
																		26			1							1									1
																		27			1							2
																		28			1							1
																		29			1
																		30			1
																		31			1
																		32			1
																		33			1
																		34			1
																			10 mg/kg CNO
																		radius, μm	Cell 1	Cell 2	Cell 3	Cell 4	Cell 5	Cell 6	Cell 7	Cell 8	Cell 9	Cell 10	Cell 11	Cell 12	Cell 13	Cell 14	Cell 15	Cell 16	Cell 17	Cell 18
																		5	2	2	2	3	4	2	2	1	3	1	2	3	2	1	2	2	2	1
																		6	4	3	5	4	8	3	2	5	5	2	3	5	5	6	4	2	4	2
																		7	2	5	5	3	5	2	5	6	6	3	1	1	7	2	5	2	6	2
																		8	1	3	4	3	4	1	4	3	4	4	1	1	4	3	8	4	4	1
																		9	1	2	3	4	3	1	4	3	5	5	1	1	3	5	4	1	4	1
																		10	2	3	2	3	1	1	3	4	4	4	1	2	2	5	3	1	6	1
																		11	2	2	1	2	1	1	1	3	5	3	1	1	1	3	2	1	5	1
																		12	1	2	1	2	1	1	1	1	6	4	1	1	1	1	1	1	2
																		13	1	2	1	4	1	1	1	1	5	3		1		1	1		2
																		14	1	1	1	2	1	1	1	2	3	2		1		1	1		1
																		15	1		2	4	1	1	1	1	3	1		1		1	1		1
																		16	1		1	3			1	1	3	1		2		1	1		1
																		17	1		1	2			1	1	3	1		1		1	1		1
																		18	1		1	2				1	2			1		1			2
																		19			1	2				1	2								1
																		20			1	1				1	1								1
																		21			1	1				1	1
																		22			1	1				1	1
																		23				1				1	1
																		24				1				1	1
																		25				1				1	1
																		26				1				1	1
																		27				1				1	1
																		28				1				1	1
																		29									1
[truncated: 34 more columns]

## Sheet: Figure 5
Figure 5c						Figure 5d						Figure 5e
GFAP+ cell density						GFAP+ cell density						GFAP+ cell density
Primary visual cortex layer 1						Primary visual cortex						Saline
Animal	Saline	0.05mg/kg	0.1mg/kg	10mg/kg		Animal	Saline	0.05mg/kg	0.1mg/kg	10mg/kg			SC	CA1	CA3
Mouse 1	2.19338	2.4708	4.9661	3.85129		Mouse 1	0.786622	1.409	1.71342	1.6966		Animal	Density	Density	Density
Mouse 2	1.45162	1.82202	3.38739	5.13228		Mouse 2	0.64581	1.01674	1.23688	2.87143		Mouse 1	0.239795	4.98035	3.43578
Mouse 3	2.84031			4.28744		Mouse 3	1.05285			1.86001		Mouse 2	0.12912	5.55217	2.6273
Primary visual cortex layer 2-4						S100B+ cell density						Mouse 3	0.12912	5.18326	3.04514
Animal	Saline	0.05mg/kg	0.1mg/kg	10mg/kg		Primary visual cortex						CNO 0.05mg/kg
Mouse 1	0.290648	0.754994	0.861415	0.794911		Animal	Saline	0.05mg/kg	0.1mg/kg	10mg/kg			SC	CA1	CA3
Mouse 2	0.260202	0.49273	0.659908	2.01984		Mouse 1	0.678338	0.294279	0.281383	1.154		Animal	Density	Density	Density
Mouse 3	0.55246			1.00388		Mouse 2	0.402268	0.0850973	0.66569	1.34353		Mouse 1	0.147566	2.32417	2.51153
Primary visual cortex layer 5						Mouse 3	0.444877			1.81916		Mouse 2	0.166012	3.44936	2.61644
Animal	Saline	0.05mg/kg	0.1mg/kg	10mg/kg		%GFAP+S100B cell density						CNO 0.1mg/kg
Mouse 1	0.170641	0.53464	0.37381	1.01601		Primary visual cortex							SC	CA1	CA3
Mouse 2	0.126738	0.680589	0.207234	0.906835		Animal	Saline	0.05mg/kg	0.1mg/kg	10mg/kg		Animal	Density	Density	Density
Mouse 3	0.114399			0.546237		Mouse 1	6.33267	7.81932	2.76611	11.4785		Mouse 1	0.184458	3.39402	3.39909
Primary visual cortex layer 6						Mouse 2	4.80159	1.48148	3.66291	17.4331		Mouse 2	0.147566	4.61144	3.81056
Animal	Saline	0.05mg/kg	0.1mg/kg	10mg/kg		Mouse 3	5.34091			16.6132		CNO 10mg/kg
Mouse 1	0.491826	1.87556	0.652364	1.12419									SC	CA1	CA3
Mouse 2	0.744683	1.07161	0.693006	3.42679								Animal	Density	Density	Density
Mouse 3	0.704239			1.60248								Mouse 1	0.313578	5.62596	4.89886
S100B+ cell density												Mouse 2	0.350469	5.93953	5.22607
Primary visual cortex layer 1												Mouse 3	0.202903	4.13185	4.80807
Animal	Saline	0.05mg/kg	0.1mg/kg	10mg/kg								S100B+ cell density
Mouse 1	0.715499	0.614442	0.859764	2.23405								Saline
Mouse 2	0.26592	0.16799	1.8192	2.02883									SC	CA1	CA3
Mouse 3	1.08419			2.55796								Animal	Density	Density	Density
Primary visual cortex layer 2-4												Mouse 1	0.73783	1.23587	1.17633
Animal	Saline	0.05mg/kg	0.1mg/kg	10mg/kg								Mouse 2	0.424252	1.531	0.601033
Mouse 1	1.07207	0.260281	0.233766	0.763998								Mouse 3	0.110675	1.06985	0.763359
Mouse 2	0.480388	0.0705938	0.452847	0.71859								CNO 0.05mg/kg
Mouse 3	0.566316			1.69725									SC	CA1	CA3
Primary visual cortex layer 5												Animal	Density	Density	Density
Animal	Saline	0.05mg/kg	0.1mg/kg	10mg/kg								Mouse 1	0.442698	0.996071	0.572446
Mouse 1	0.749161	0.248492	0.0320022	1.18402								Mouse 2	0.571819	0.996071	1.05155
Mouse 2	0.554076	0.101806	0.229828	1.07533								CNO 0.1mg/kg
Mouse 3	0.0843695			1.61366									SC	CA1	CA3
Primary visual cortex layer 6												Animal	Density	Density	Density
Animal	Saline	0.05mg/kg	0.1mg/kg	10mg/kg								Mouse 1	0.719385	1.03296	0.936709
Mouse 1	0.176627	0.0539006	0	0.43392								Mouse 2	0.848505	0.996071	1.95181
Mouse 2	0.308691	0	0.160887	1.55138								CNO 10mg/kg
Mouse 3	0.0446317			1.40777									SC	CA1	CA3
%GFAP+S100B cell density												Animal	Density	Density	Density
Primary visual cortex layer 1												Mouse 1	0.977625	1.62323	1.13371
Animal	Saline	0.05mg/kg	0.1mg/kg	10mg/kg								Mouse 2	0.756276	1.78924	1.26437
Mouse 1	15.2381	10.5882	7.14286	17.0595								Mouse 3	1.42032	1.40188	1.92196
Mouse 2	0	0	7.50877	16.4782								%GFAP+S100B cell density
Mouse 3	3.0303			16.7825								Saline
Primary visual cortex layer 2-4													SC	CA1	CA3
Animal	Saline	0.05mg/kg	0.1mg/kg	10mg/kg								Animal	Density	Density	Density
Mouse 1	4.16667	5.15873	3.92157	12.8624								Mouse 1	5.77031	15.0824	15.0628
Mouse 2	5.55556	3.7037	2.38095	15.1641								Mouse 2	2.5641	14.8189	8.69525
Mouse 3	10			10.6861								Mouse 3	0	11.1621	5.2381
Primary visual cortex layer 5												CNO 0.05mg/kg
Animal	Saline	0.05mg/kg	0.1mg/kg	10mg/kg									SC	CA1	CA3
Mouse 1	2.22222	15.5303	0	9.44444								Animal	Density	Density	Density
Mouse 2	8.88889	2.22222	4.7619	18.2234								Mouse 1	3.0303	16.814	10.8187
Mouse 3	8.33333			15.6134								Mouse 2	4.46429	13.2774	16.4188
Primary visual cortex layer 6												CNO 0.1mg/kg
Animal	Saline	0.05mg/kg	0.1mg/kg	10mg/kg									SC	CA1	CA3
Mouse 1	3.7037	0	0	6.54762								Animal	Density	Density	Density
Mouse 2	4.7619	0	0	19.8668								Mouse 1	5.25794	18.0267	9.94364
Mouse 3	0			23.3709								Mouse 2	4.78469	14.4115	17.7725
												CNO 10mg/kg
													SC	CA1	CA3
												Animal	Density	Density	Density
												Mouse 1	7.61461	15.7706	15.1106
												Mouse 2	9.84262	20.4289	12.471
												Mouse 3	11.1525	17.5025	16.3734

## Sheet: Figure 6
Figure 6c					Figure 6d					Figure 6e
GFAP+ cell density					GFAP+ cell density					GFAP+ cell density
Primary visual cortex layer 1					Primary visual cortex					Saline
Animal	Saline	1mg/kg	5mg/kg		Animal	Saline	1mg/kg	5mg/kg			SC	CA1	CA3
Mouse 1	3.52632	2.43842	2.28335		Mouse 1	1.63477	1.74641	0.863887		Animal	Density	Density	Density
Mouse 2	2.49978	2.3877	1.66739		Mouse 2	1.13095	1.47623	1.03592		Mouse 1	0.295132	4.29786	4.80003
Primary visual cortex layer 2-4					S100B+ cell density					Mouse 2	0.276686	4.81434	5.01579
Animal	Saline	1mg/kg	5mg/kg		Primary visual cortex					CNO 1mg/kg
Mouse 1	0.75333	1.1324	0.166868		Animal	Saline	1mg/kg	5mg/kg			SC	CA1	CA3
Mouse 2	0.444034	0.852549	0.273103		Mouse 1	1.06429	1.05404	0.324676		Animal	Density	Density	Density
Primary visual cortex layer 5					Mouse 2	0.643596	0.722593	0.572464		Mouse 1	0.147566	5.01725	3.63043
Animal	Saline	1mg/kg	5mg/kg		%GFAP+S100B cell density					Mouse 2	0.110675	3.062	3.29964
Mouse 1	0.247937	0.924732	0.136382		Primary visual cortex					CNO 5mg/kg
Mouse 2	0.102661	0.43548	0.600352		Animal	Saline	1mg/kg	5mg/kg			SC	CA1	CA3
Primary visual cortex layer 6					Mouse 1	15.475	17.2046	6.70364		Animal	Density	Density	Density
Animal	Saline	1mg/kg	5mg/kg		Mouse 2	11.6275	14.1335	9.90182		Mouse 1	0	2.49018	2.98349
Mouse 1	2.01149	2.4901	0.868945							Mouse 2	0.110675	2.71153	3.44922
Mouse 2	1.47731	2.22919	1.60282							S100B+ cell density
S100B+ cell density										Saline
Primary visual cortex layer 1											SC	CA1	CA3
Animal	Saline	1mg/kg	5mg/kg							Animal	Density	Density	Density
Mouse 1	2.31794	1.8201	0.702841							Mouse 1	0.830059	0.848505	0.905267
Mouse 2	1.65784	1.58974	1.05355							Mouse 2	0.885396	0.903842	1.06365
Primary visual cortex layer 2-4										CNO 1mg/kg
Animal	Saline	1mg/kg	5mg/kg								SC	CA1	CA3
Mouse 1	0.667847	0.829206	0.245115							Animal	Density	Density	Density
Mouse 2	0.420465	0.620644	0.351349							Mouse 1	1.03296	1.25431	0.896507
Primary visual cortex layer 5										Mouse 2	0.682493	1.0883	0.707707
Animal	Saline	1mg/kg	5mg/kg							CNO 5mg/kg
Mouse 1	0.656395	0.853506	0.103437								SC	CA1	CA3
Mouse 2	0.140404	0.3495	0.350229							Animal	Density	Density	Density
Primary visual cortex layer 6										Mouse 1	0.202903	0.12912	0.622825
Animal	Saline	1mg/kg	5mg/kg							Mouse 2	0.295132	0.147566	0.695356
Mouse 1	0.614971	0.713368	0.247311							%GFAP+S100B cell density
Mouse 2	0.355679	0.330487	0.534734							Saline
%GFAP+S100B											SC	CA1	CA3
Primary visual cortex layer 1										Animal	Density	Density	Density
Animal	Saline	1mg/kg	5mg/kg							Mouse 1	8.83333	13.279	12.4574
Mouse 1	27.9151	21.4379	5.15873							Mouse 2	9.34783	11.5382	12.3755
Mouse 2	14.9733	16.6204	13.75							CNO 1mg/kg
Primary visual cortex layer 2-4											SC	CA1	CA3
Animal	Saline	1mg/kg	5mg/kg							Animal	Density	Density	Density
Mouse 1	7.77778	16.7157	4.16667							Mouse 1	4.69697	8.88881	11.2187
Mouse 2	10.6481	16.6667	6.73401							Mouse 2	7.26311	9.17706	11.7637
Primary visual cortex layer 5										CNO 5mg/kg
Animal	Saline	1mg/kg	5mg/kg								SC	CA1	CA3
Mouse 1	16.6667	18.3333	6.66667							Animal	Density	Density	Density
Mouse 2	13.3333	15.5952	8.62471							Mouse 1	0	1.96078	9.7784
Primary visual cortex layer 6										Mouse 2	8.33333	3.89097	10.4194
Animal	Saline	1mg/kg	5mg/kg
Mouse 1	9.54052	12.3316	10.8225
Mouse 2	7.55519	7.65182	10.4986

## Sheet: Figure 7
Figure 7b
Excitatory DREADDs		RSA - All			PTLp - All			S1 - All
Overall Regions		Mouse 1	Mouse 2	Mouse 3	Mouse 1	Mouse 2	Mouse 3	Mouse 1	Mouse 2	Mouse 3
PV+ Density	Saline	7.148e-05	2.0619e-05	9.5378e-05	0	0	0	6.3333e-05	4.2782e-05	7.8018e-05
	CNO	0.00012492	6.2341e-05	8.4045e-05	0	0	0.0001376	0.0001291	7.4778e-05	0.00016472
PV+/VVA+ Density	Saline	5.2809e-05	1.4155e-05	7.6091e-05	0	0	0	4.3678e-05	2.8037e-05	5.5173e-05
	CNO	0.00010602	4.5879e-05	5.3056e-05	0	0	5.2421e-05	9.4445e-05	5.6838e-05	0.00011765
VVA+ Density	Saline	0.00018297	0.00015525	0.00019819	0	0	0	0.00013103	0.00015676	0.00019225
	CNO	5.4192e-05	0.00016401	8.7801e-05	0	0	3.4947e-05	4.4844e-05	0.00017314	0.00014119
PV+/VVA- Density	Saline	1.867e-05	6.4643e-06	1.9287e-05	0	0	0	1.9655e-05	1.4746e-05	2.2844e-05
	CNO	1.8895e-05	1.6462e-05	3.0989e-05	0	0	8.5184e-05	3.4652e-05	1.794e-05	4.7062e-05
Figures 7d-e
Excitatory DREADDs		L1			L2			L3			L4			L5			L6a			L6b
RSA		Mouse 1	Mouse 2	Mouse 3	Mouse 1	Mouse 2	Mouse 3	Mouse 1	Mouse 2	Mouse 3	Mouse 1	Mouse 2	Mouse 3	Mouse 1	Mouse 2	Mouse 3	Mouse 1	Mouse 2	Mouse 3	Mouse 1	Mouse 2	Mouse 3
PV+ Density	Saline	0	1.3551e-06	1.9164e-05	6.1881e-05	2.7215e-05	0.00011088	6.1881e-05	2.7215e-05	0.00011088	0	0	0	0.00012521	3.2854e-05	0.00014526	6.3872e-05	1.0595e-05	6.9033e-05	0	0	1.1593e-05
	CNO	7.6446e-06	2.4828e-06	3.7937e-06	0.00011931	5.7762e-05	7.3677e-05	0.00011931	5.7762e-05	7.3677e-05	0	0	0	0.00024559	9.2538e-05	0.00015719	0.00011995	0.00011406	8.7103e-05	2.9199e-05	7.3475e-05	0
PV+/VVA+ Density	Saline	0	1.3551e-06	1.4537e-05	4.5911e-05	2.0811e-05	9.1451e-05	4.5911e-05	2.0811e-05	9.1451e-05	0	0	0	9.8604e-05	2.2373e-05	0.00012232	3.6102e-05	3.8731e-06	3.9912e-05	0	0	1.1593e-05
	CNO	5.7335e-06	2.4828e-06	3.7937e-06	0.00010827	4.5584e-05	5.0873e-05	0.00010827	4.5584e-05	5.0873e-05	0	0	0	0.00021927	7.2729e-05	0.00010283	7.3816e-05	6.0031e-05	3.733e-05	2.9199e-05	2.4492e-05	0
VVA+ Density	Saline	2.3581e-05	2.0049e-05	7.009e-05	0.00025551	0.00020793	0.00025519	0.00025551	0.00020793	0.00025519	0	0	0	0.00028642	0.00024942	0.00029552	6.6649e-05	5.9281e-05	8.5968e-05	0	3.6924e-05	2.3187e-05
	CNO	1.3378e-05	1.8278e-05	3.7937e-06	9.2248e-05	0.00018766	9.8237e-05	9.2248e-05	0.00018766	9.8237e-05	0	0	0	8.771e-05	0.00026501	0.00017335	1.3841e-05	0.00011004	3.4219e-05	0	2.4492e-05	0
PV+/VVA- Density	Saline	0	0	4.6274e-06	1.5969e-05	6.4044e-06	1.9425e-05	1.5969e-05	6.4044e-06	1.9425e-05	0	0	0	2.6607e-05	1.0482e-05	2.2936e-05	2.777e-05	6.7218e-06	2.9121e-05	0	0	0
	CNO	1.9112e-06	0	0	1.1048e-05	1.2178e-05	2.2805e-05	1.1048e-05	1.2178e-05	2.2805e-05	0	0	0	2.6313e-05	1.9808e-05	5.4355e-05	4.6135e-05	5.4033e-05	4.9773e-05	0	4.8983e-05	0
Figures 7g-h
Excitatory DREADDs		L1			L2			L3			L4			L5			L6a			L6b
Overall PTLp		Mouse 1	Mouse 2	Mouse 3	Mouse 1	Mouse 2	Mouse 3	Mouse 1	Mouse 2	Mouse 3	Mouse 1	Mouse 2	Mouse 3	Mouse 1	Mouse 2	Mouse 3	Mouse 1	Mouse 2	Mouse 3	Mouse 1	Mouse 2	Mouse 3
PV+ Density	Saline	0	0	0	0	0	0	0	0	0	0	0	0	0.00013657	1.5288e-05	4.5214e-05	0.00012502	0	3.8683e-05	0	0	2.1903e-05
	CNO	0	0	0	0	0	0.0001214	0	0	0.0001214	0	0	0.00013192	0.00018824	0	0.00021497	7.463e-05	0	0.00017348	0	0	4.2538e-05
PV+/VVA+ Density	Saline	0	0	0	0	0	0	0	0	0	0	0	0	6.4269e-05	0	1.9894e-05	5.2892e-05	0	2.3805e-05	0	0	2.1903e-05
	CNO	0	0	0	0	0	4.6133e-05	0	0	4.6133e-05	0	0	0.00011393	7.9763e-05	0	8.1028e-05	2.0354e-05	0	6.3335e-05	0	0	0
VVA+ Density	Saline	0	0	0	0	0	0	0	0	0	0	0	0	6.1591e-05	7.4438e-05	3.375e-05	5.77e-05	0	3.2732e-05	0	0	0
	CNO	0	0	0	0	0	3.8848e-05	0	0	3.8848e-05	0	0	0.00011393	2.3131e-05	0	3.9687e-05	3.3923e-06	0	3.5798e-05	0	0	0
PV+/VVA- Density	Saline	0	0	0	0	0	0	0	0	0	0	0	0	7.2302e-05	1.5288e-05	2.532e-05	7.2125e-05	0	1.4878e-05	0	0	0
	CNO	0	0	0	0	0	7.5269e-05	0	0	7.5269e-05	0	0	1.7989e-05	0.00010848	0	0.00013394	5.4277e-05	0	0.00011015	0	0	4.2538e-05
Figures 7j-k
Excitatory DREADDs		L1			L2			L3			L4			L5			L6a			L6b
S1		Mouse 1	Mouse 2	Mouse 3	Mouse 1	Mouse 2	Mouse 3	Mouse 1	Mouse 2	Mouse 3	Mouse 1	Mouse 2	Mouse 3	Mouse 1	Mouse 2	Mouse 3	Mouse 1	Mouse 2	Mouse 3	Mouse 1	Mouse 2	Mouse 3
PV+ Density	Saline	0	1.0789e-06	1.0546e-05	5.2486e-05	3.0183e-05	5.703e-05	5.2486e-05	3.0183e-05	5.703e-05	8.0748e-05	5.7944e-05	9.8559e-05	9.5843e-05	7.0585e-05	0.00015103	6.1594e-05	3.9765e-05	5.0182e-05	1.4114e-05	9.8822e-06	1.3307e-05
	CNO	3.6043e-06	7.1422e-07	1.6996e-05	9.4429e-05	6.1278e-05	0.00013508	9.4429e-05	6.1278e-05	0.00013508	0.00016842	0.00012723	0.00021665	0.00022875	0.00011081	0.00024186	0.00010162	6.2288e-05	0.00016581	3.1067e-05	1.7431e-05	0
PV+/VVA+ Density	Saline	0	1.0789e-06	2.246e-06	2.6243e-05	1.5926e-05	3.442e-05	2.6243e-05	1.5926e-05	3.442e-05	7.3058e-05	5.5945e-05	9.301e-05	6.9403e-05	4.296e-05	0.00010245	3.6396e-05	2.0634e-05	3.2043e-05	0	3.2425e-06	0
	CNO	3.6043e-06	0	0	5.9741e-05	4.1936e-05	7.8202e-05	5.9741e-05	4.1936e-05	7.8202e-05	0.00015328	0.00012506	0.00021665	0.00017527	8.3185e-05	0.00015452	5.6322e-05	3.7822e-05	0.00010814	7.7668e-06	0	0
VVA+ Density	Saline	0	0	3.369e-06	7.498e-05	6.3967e-05	0.00013129	7.498e-05	6.3967e-05	0.00013129	0.00029992	0.00041694	0.00050737	0.00015864	0.00018881	0.00022423	9.5191e-05	0.00011887	0.00010351	0	0	0
	CNO	9.0108e-07	2.1213e-06	0	2.6016e-05	0.00012197	4.2655e-05	2.6016e-05	0.00012197	4.2655e-05	0.00011591	0.0005172	0.00041663	5.8672e-05	0.00019055	9.4058e-05	2.1121e-05	9.7593e-05	0.00014418	1.9417e-06	0	0
PV+/VVA- Density	Saline	0	0	8.3004e-06	2.6243e-05	1.4257e-05	2.261e-05	2.6243e-05	1.4257e-05	2.261e-05	7.6903e-06	1.9988e-06	5.5482e-06	2.6439e-05	2.7625e-05	4.8581e-05	2.5198e-05	1.9131e-05	1.814e-05	1.4114e-05	6.6398e-06	1.3307e-05
	CNO	0	7.1422e-07	1.6996e-05	3.4688e-05	1.9342e-05	5.6874e-05	3.4688e-05	1.9342e-05	5.6874e-05	1.5139e-05	2.174e-06	0	5.3473e-05	2.7621e-05	8.7339e-05	4.5303e-05	2.4466e-05	5.7673e-05	2.33e-05	1.7431e-05	0

## Sheet: Figure 8
Figure 8b
Inhibitory DREADDs		RSA - All		PTLp - All		S1 - All
Overall Regions		Mouse 1	Mouse 2	Mouse 1	Mouse 2	Mouse 1	Mouse 2
PV+ Density	Saline	7.8998e-05	3.8969e-05	5.5169e-05	0	5.7717e-05	5.9975e-05
	CNO	9.6015e-05	3.647e-05	4.9139e-05	5.927e-05	7.1023e-05	3.9031e-05
PV+/VVA+ Density	Saline	4.8201e-05	2.4843e-05	3.9841e-06	0	3.3806e-05	4.1437e-05
	CNO	6.8992e-05	2.5101e-05	2.106e-05	1.499e-05	4.4735e-05	1.5649e-05
VVA+ Density	Saline	0.00013626	0.00013152	5.9762e-06	0	0.00014852	0.00011859
	CNO	0.00015542	0.00019675	7.0199e-06	2.6573e-05	0.00013271	8.6237e-05
PV+/VVA- Density	Saline	3.0797e-05	1.4126e-05	5.1185e-05	0	2.3911e-05	1.8538e-05
	CNO	2.7023e-05	1.1369e-05	2.808e-05	4.4279e-05	2.6288e-05	2.3381e-05
Figures 8d-e
Excitatory DREADDs		L1		L2		L3		L4		L5		L6a		L6b
RSA		Mouse 1	Mouse 2	Mouse 1	Mouse 2	Mouse 1	Mouse 2	Mouse 1	Mouse 2	Mouse 1	Mouse 2	Mouse 1	Mouse 2	Mouse 1	Mouse 2
PV+ Density	Saline	3.8679e-06	0	7.0056e-05	1.9885e-05	7.0056e-05	1.9885e-05	0	0	0.0001534	5.8488e-05	3.8363e-05	7.2831e-05	2.4373e-05	2.3874e-05
	CNO	9.9671e-07	2.8862e-06	7.7354e-05	3.5651e-05	7.7354e-05	3.5651e-05	0	0	0.00016527	5.9561e-05	0.00010037	2.9884e-05	2.7936e-05	8.4387e-06
PV+/VVA+ Density	Saline	1.3256e-06	0	4.2552e-05	9.0384e-06	4.2552e-05	9.0384e-06	0	0	0.00010075	4.4223e-05	1.0718e-05	3.7764e-05	2.4373e-05	2.3874e-05
	CNO	9.9671e-07	1.9069e-06	5.8909e-05	2.577e-05	5.8909e-05	2.577e-05	0	0	0.00012884	4.1589e-05	5.1116e-05	1.7873e-05	0	0
VVA+ Density	Saline	2.6513e-06	1.2949e-05	0.00018669	0.00017354	0.00018669	0.00017354	0	0	0.00023269	0.00021113	4.202e-05	5.6646e-05	2.4373e-05	0
	CNO	1.215e-05	1.4155e-05	0.00019392	0.00022882	0.00019392	0.00022882	0	0	0.00026918	0.00034853	5.1768e-05	7.0111e-05	2.8295e-05	0
PV+/VVA- Density	Saline	2.5422e-06	0	2.7504e-05	1.0846e-05	2.7504e-05	1.0846e-05	0	0	5.2652e-05	1.4265e-05	2.7646e-05	3.5067e-05	0	0
	CNO	0	9.7934e-07	1.8446e-05	9.8805e-06	1.8446e-05	9.8805e-06	0	0	3.6433e-05	1.7972e-05	4.9253e-05	1.2011e-05	2.7936e-05	8.4387e-06
Figures 8g-h
Inhibitory DREADDs		L1		L2		L3		L4		L5		L6a		L6b
Overall PTLp		Mouse 1	Mouse 2	Mouse 1	Mouse 2	Mouse 1	Mouse 2	Mouse 1	Mouse 2	Mouse 1	Mouse 2	Mouse 1	Mouse 2	Mouse 1	Mouse 2
PV+ Density	Saline	2.002e-05	0	5.381e-05	0	5.381e-05	0	6.7445e-05	0	0.00010089	5.6794e-05	5.6542e-05	5.8784e-05	0	0
	CNO	0	2.6275e-06	6.784e-05	8.4487e-05	6.784e-05	8.4487e-05	8.3135e-05	7.4301e-05	0.00013747	6.926e-05	0.00013046	3.5107e-05	1.3994e-05	1.6283e-05
PV+/VVA+ Density	Saline	0	0	0	0	0	0	2.2482e-05	0	2.3701e-05	8.1134e-06	2.2447e-05	2.9392e-05	0	0
	CNO	0	0	3.392e-05	2.1705e-05	3.392e-05	2.1705e-05	4.1568e-05	2.2948e-05	6.8382e-05	2.5961e-05	3.8054e-05	1.4905e-05	0	0
VVA+ Density	Saline	0	0	5.508e-06	0	5.508e-06	0	4.4963e-05	0	4.3942e-05	3.651e-05	3.6302e-05	5.8784e-05	0	0
	CNO	0	0	5.6533e-06	3.8661e-05	5.6533e-06	3.8661e-05	4.1568e-05	8.0703e-05	6.6691e-05	9.9251e-05	0.00010497	4.3825e-05	0	0
PV+/VVA- Density	Saline	2.002e-05	0	5.381e-05	0	5.381e-05	0	4.4963e-05	0	7.7185e-05	4.8681e-05	3.4095e-05	2.9392e-05	0	0
	CNO	0	2.6275e-06	3.392e-05	6.2783e-05	3.392e-05	6.2783e-05	4.1568e-05	5.1353e-05	6.9088e-05	4.3299e-05	9.2404e-05	2.0203e-05	1.3994e-05	1.6283e-05
Figures 8j-k
Inhibitory DREADDs		L1		L2		L3		L4		L5		L6a		L6b
S1		Mouse 1	Mouse 2	Mouse 1	Mouse 2	Mouse 1	Mouse 2	Mouse 1	Mouse 2	Mouse 1	Mouse 2	Mouse 1	Mouse 2	Mouse 1	Mouse 2
PV+ Density	Saline	5.7561e-06	5.2384e-06	4.5139e-05	6.2041e-05	4.5139e-05	6.2041e-05	0.0001065	6.5004e-05	8.4717e-05	8.7744e-05	4.0792e-05	6.2094e-05	0	0
	CNO	5.9565e-06	0	6.203e-05	5.2859e-05	6.203e-05	5.2859e-05	9.2865e-05	5.6857e-05	0.00011645	5.4419e-05	6.0146e-05	2.0481e-05	1.958e-05	8.025e-06
PV+/VVA+ Density	Saline	0	2.6192e-06	2.3547e-05	3.2369e-05	2.3547e-05	3.2369e-05	8.5395e-05	6.0361e-05	4.8469e-05	6.7688e-05	1.2695e-05	3.5186e-05	0	0
	CNO	1.4004e-06	0	3.0056e-05	5.7017e-06	3.0056e-05	5.7017e-06	8.6962e-05	3.8096e-05	7.6528e-05	2.7527e-05	2.456e-05	3.8532e-06	7.6961e-06	0
VVA+ Density	Saline	0	5.2384e-06	6.9663e-05	5.1251e-05	6.9663e-05	5.1251e-05	0.00035946	0.00032812	0.00018815	0.00015293	0.00010675	6.3129e-05	0	0
	CNO	6.3113e-07	0	5.6466e-05	2.1661e-05	5.6466e-05	2.1661e-05	0.00037004	0.00022315	0.00015301	0.00010169	8.939e-05	6.4974e-05	0	4.7277e-06
PV+/VVA- Density	Saline	5.7561e-06	2.6192e-06	2.1592e-05	2.9672e-05	2.1592e-05	2.9672e-05	2.1101e-05	4.6431e-06	3.6248e-05	2.0056e-05	2.8097e-05	2.6907e-05	0	0
	CNO	4.5561e-06	0	3.1974e-05	4.7157e-05	3.1974e-05	4.7157e-05	5.9033e-06	1.8762e-05	3.9921e-05	2.6892e-05	3.5586e-05	1.6628e-05	1.1883e-05	8.025e-06

## Sheet: S Figure 1
S Figure 1b
	Saline
		V1L5	SC	CA1	CA3
Line	Animal	Density	Density	Density	Density
Rbp4Cre	Mouse 1	6.00409	1.46644	0.0553373	0.0276686
	Mouse 2	5.45072	1.46644	0	0.0276686
hM4Di	Mouse 1	6.47446	1.66012	0	0.0553373
	Mouse 2	6.80649	1.30043	0.0276686	0.0553373
hM3Dq	Mouse 1	15.4391	3.32024	0.0553373	0.110675
	Mouse 2	13.945	3.56925	0.19368	0.138343
S Figure 1c
	Saline
		V1L5	SC	CA1	CA3
Line	Animal	Density	Density	Density	Density
Rbp4Cre	Mouse 1	6.00409	1.46644	0.0553373	0.0276686
	Mouse 2	5.45072	1.46644	0	0.0276686
hM4Di	Mouse 1	6.47446	1.66012	0	0.0553373
	Mouse 2	6.80649	1.30043	0.0276686	0.0553373
Rbp4Cre-hM4Di	Mouse 1	3.7076	2.21349	0.0276686	0.0276686
	Mouse 2	3.92895	2.54551	0.0553373	0.0830059
hM3Dq	Mouse 1	15.4391	3.32024	0.0553373	0.110675
	Mouse 2	13.945	3.56925	0.19368	0.138343
Rbp4Cre-hM3Dq	Mouse 1	4.70367	1.60478	0.0276686	0.0276686
	Mouse 2	4.62066	1.54944	0.0276686	0.0276686
	Mouse 3	4.01195	1.02374	0	0.0276686
	Mouse 4	3.95662	1.13441	0.0276686	0.0276686
	Mouse 5	4.1503	1.02374	0.0276686	0
	Mouse 6	3.62459	1.10675	0.0276686	0.0276686

## Sheet: S Figure 2
Figures 2a-b
Excitatory DREADDs		Sub			CA1			CA2			CA3			DGm			DGp			DGg
Hippocampus		Mouse 1	Mouse 2	Mouse 3	Mouse 1	Mouse 2	Mouse 3	Mouse 1	Mouse 2	Mouse 3	Mouse 1	Mouse 2	Mouse 3	Mouse 1	Mouse 2	Mouse 3	Mouse 1	Mouse 2	Mouse 3	Mouse 1	Mouse 2	Mouse 3
PV+ Density	Saline	0	0	0	3.1857e-05	1.7096e-05	3.2056e-05	5.4531e-05	1.9335e-05	2.9288e-05	4.6269e-05	2.8034e-05	3.7964e-05	0	7.4595e-07	3.039e-06	0	0	8.3924e-06	1.2529e-05	3.4937e-06	2.557e-05
	CNO	0	0	4.7091e-05	1.8879e-05	0	4.5693e-05	2.1969e-05	8.0247e-06	8.1798e-05	4.8636e-05	2.9409e-05	4.5632e-05	0	0	1.2374e-06	2.8131e-05	0	4.9165e-05	2.8131e-05	1.269e-05	0.00010171
PV+/VVA+ Density	Saline	0	0	0	2.9622e-05	1.351e-05	2.361e-05	2.1812e-05	1.252e-05	1.8346e-05	3.5252e-05	1.6526e-05	1.6763e-05	0	7.4595e-07	1.1666e-06	0	0	8.3924e-06	1.2529e-05	0	1.5519e-05
	CNO	0	0	3.5318e-05	1.2979e-05	0	2.7924e-05	2.1969e-05	4.0123e-06	4.0899e-05	2.0844e-05	1.7493e-05	2.7537e-05	0	0	1.2374e-06	2.8131e-05	0	2.9499e-05	1.1252e-05	1.269e-05	6.7805e-05
VVA+ Density	Saline	0	0	0	5.3096e-05	7.6407e-05	8.8391e-05	1.0906e-05	5.5786e-05	3.5824e-05	5.5082e-05	4.5633e-05	5.3626e-05	6.4534e-06	2.2378e-06	5.4035e-06	2.2285e-05	5.3635e-05	4.7518e-05	4.6985e-05	3.0185e-05	3.9392e-05
	CNO	0	0	0.00012361	2.1239e-05	0	3.977e-05	2.1969e-05	2.0062e-05	3.0674e-05	1.0422e-05	4.6492e-05	4.5632e-05	2.8241e-06	1.0561e-05	3.3411e-05	3.5164e-05	0.0001045	6.8832e-05	1.6879e-05	1.4741e-05	3.7293e-05
PV+/VVA- Density	Saline	0	0	0	2.2356e-06	3.5858e-06	8.4456e-06	3.2719e-05	6.8146e-06	1.0942e-05	1.1016e-05	1.1509e-05	2.1201e-05	0	0	1.8724e-06	0	0	0	0	3.4937e-06	1.0051e-05
	CNO	0	0	1.1773e-05	5.8996e-06	0	1.777e-05	0	4.0123e-06	4.0899e-05	2.7792e-05	1.1916e-05	1.8096e-05	0	0	0	0	0	1.9666e-05	1.6879e-05	0	3.3903e-05
Figures 2c-d
Excitatory DREADDs		APTN			GPe			GPi			ZI			CP			RNT			HOTN
Other Subcortical Regions		Mouse 1	Mouse 2	Mouse 3	Mouse 1	Mouse 2	Mouse 3	Mouse 1	Mouse 2	Mouse 3	Mouse 1	Mouse 2	Mouse 3	Mouse 1	Mouse 2	Mouse 3	Mouse 1	Mouse 2	Mouse 3	Mouse 1	Mouse 2	Mouse 3
PV+ Density	Saline	0	0	0	0	1.5832e-05	2.5653e-05	0	9.1275e-06	1.9149e-05	2.666e-05	6.7294e-06	1.0893e-05	4.0782e-05	1.4711e-05	1.9536e-05	0.00037754	0.00016608	0.00041758	5.694e-05	2.2915e-05	5.6815e-05
	CNO	0	0	1.5222e-05	8.4137e-05	0.00013245	0	0.00016879	1.5749e-05	0	4.1404e-05	0.00036251	6.0514e-05	5.2809e-05	1.288e-05	5.0322e-05	0.00049147	0.00052862	0	0.00012428	2.3143e-05	2.3539e-05
PV+/VVA+ Density	Saline	0	0	0	0	1.4681e-05	2.317e-05	0	9.1275e-06	1.9149e-05	2.666e-05	6.7294e-06	9.1715e-06	1.8692e-05	4.7654e-06	7.3345e-06	0.00037754	0.00016608	0.00041413	4.665e-05	1.6601e-05	3.7937e-05
	CNO	0	0	1.2178e-05	6.3103e-05	0.00010548	0	0.00016879	1.2361e-05	0	3.5489e-05	0.00025585	6.0514e-05	1.6854e-05	3.9244e-06	1.5576e-05	0.00049147	0.00052635	0	0.00010737	1.6551e-05	1.8107e-05
VVA+ Density	Saline	0	0	0	0	3.9332e-06	1.7715e-06	0	6.9287e-05	0.00017386	3.1103e-05	9.1094e-05	8.0153e-05	1.6993e-06	2.3067e-06	2.0402e-06	0.00062096	0.00045511	0.00070931	1.1662e-05	2.1922e-06	3.1323e-06
	CNO	0	0	1.5222e-05	3.5057e-06	2.2024e-05	0	4.2197e-05	1.0919e-05	0	3.401e-05	2.3517e-05	4.8627e-05	5.0562e-06	3.0534e-06	2.3963e-06	0.00021601	0.00067979	0	2.1136e-06	9.7168e-06	2.9424e-06
PV+/VVA- Density	Saline	0	0	0	0	1.1509e-06	2.483e-06	0	0	0	0	0	1.7213e-06	2.209e-05	9.9453e-06	1.2202e-05	0	0	3.4532e-06	1.029e-05	6.3142e-06	1.8878e-05
	CNO	0	0	3.0444e-06	2.1034e-05	2.6974e-05	0	0	3.3879e-06	0	5.9148e-06	0.00010667	0	3.5955e-05	8.9559e-06	3.4746e-05	0	2.2685e-06	0	1.6909e-05	6.5914e-06	5.4321e-06

[truncated: 1 more sheets: S Figure 3]
